# Supplementary material
Source: Elsevier journal article supplement (https://www.sciencedirect.com/science/article/pii/S0033833813002208)
Supplement: mmc1 [file S0033833813002208:mmc1.xlsx]

## Sheet: Hoja1
INTRODUCCIÓN DE DATOS
	A1 4-CÁMARAS (cm2)	A2 EJE LARGO (cm2)	A3 EC plano medio (cm2)	LONGITUD VI(cm)	DIÁMETRO VI (cm)	A4 EC plano basal (cm2)
DIASTOLE
SÍSTOLE
MÉTODO SIMPSON. AREA DE LOS PLANOS EC (cm2). Máximo 10 medidas. Introducir la longitud VI, número y grosor de las imágenes (si no se conoce usar grosor 0,8)
	AREA 1	AREA2	AREA3	AREA4	AREA5	AREA6	AREA7	AREA8	AREA 9	AREA10
DIASTOLE
	#VALUE!	#VALUE!	#VALUE!	#VALUE!	#VALUE!	#VALUE!	#VALUE!	#VALUE!	#VALUE!	#VALUE!
SÍSTOLE
	#VALUE!	#VALUE!	#VALUE!	#VALUE!	#VALUE!	#VALUE!	#VALUE!	#VALUE!	#VALUE!	#VALUE!
GROSOR IMAGEN	0.8	NÚMERO DE CORTES	10
#VALUE!				Seguir introducciendo el resto de las areas de las distintas imágenes en EC.
RESULTADOS CON DIFERENTES METODOS
	Modelo Teichholz	Simpson modificado	Modelo de hemiesfera	Plano simple	Elipsoide biplano	Modelo triplano	SIMPSON
VTD	#VALUE!	#VALUE!	#VALUE!	#VALUE!	#VALUE!	#VALUE!	#VALUE!
VTS	#VALUE!	#VALUE!	#VALUE!	#VALUE!	#VALUE!	#VALUE!	#VALUE!
VS	#VALUE!	#VALUE!	#VALUE!	#VALUE!	#VALUE!	#VALUE!	#VALUE!
FE	#VALUE!	#VALUE!	#VALUE!	#VALUE!	#VALUE!	#VALUE!	#VALUE!
	CUANTIFICACIÓN MASA MIOCÁRDICA
	AREA 1	AREA 2	AREA 3	AREA 4	AREA 5	AREA 6	AREA 7	AREA 8	AREA 9	AREA 10
38
	Grosor septo (cm)	Pared posterior (cm)		Peso (kg)	Altura (cm)
DIÁSTOLE	1	1
	ASE	SIMPSON
Masa VI	#VALUE!	#VALUE!	gr	BSA (superficie corporal)	#VALUE!
Masa VI indexada	#VALUE!	#VALUE!	gr/m2	Fracción acortamiento	#VALUE!
				Área de acortamiento	#VALUE!
Grosor Relativo	#VALUE!	Valorar el tipo de hipertrofia según los resultado y el esquema adjunto.
	#VALUE!	#VALUE!	#VALUE!	#VALUE!	#VALUE!	#VALUE!	#VALUE!	#VALUE!	#VALUE!	#VALUE!
